# Supplementary material for: Enhanced visible-light-induced photocatalytic performance of a novel ternary semiconductor coupling system based on hybrid Zn–In mixed metal oxide/g-C3N4 composites
Source: Royal Society of Chemistry journal article supplement (doi:10.1039/c4ra07073a), 2014-12-12
Supplement: c4ra07073a1.pdf [file c4ra07073a1.pdf]

## Supporting Information

### Enhanced visible-light-induced photocatalytic performance of novel ternary semiconductor coupling system based on hybrid Zn-In mixed metal oxide/g-C<sub>3</sub>N<sub>4</sub> composites

Meng Lan, Guoli Fan, Lan Yang, Feng Li\*

State Key Laboratory of Chemical Resource Engineering, Beijing University of Chemical Technology, P.O.BOX 98, Beijing, 100029, P.R. China

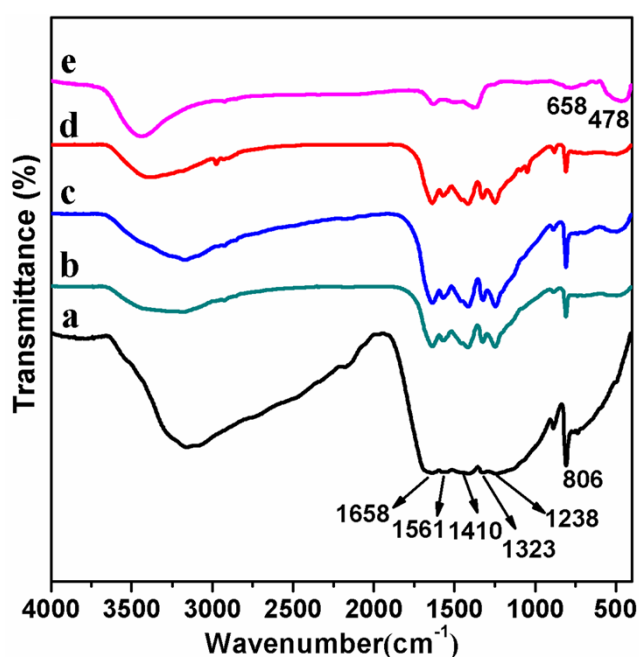

**Fig. S1** FT-IR spectra of pure g-C<sub>3</sub>N<sub>4</sub> (a), 5-MMO/C<sub>3</sub>N<sub>4</sub> (b), 3-MMO/C<sub>3</sub>N<sub>4</sub> (c) 1-MMO/C<sub>3</sub>N<sub>4</sub> (d) and ZnIn-MMO (e). In the case of ZnIn-MMO/g-C<sub>3</sub>N<sub>4</sub> composites, there are the strong absorption peaks for the typical C=N and C-N stretching modes of the C<sub>3</sub>N<sub>4</sub> heterocycles at 1238, 1323, 1410, 1561, and 1658 cm<sup>-1</sup> and the characteristic breathing mode of the s-triazine units at 806 cm<sup>-1</sup>.

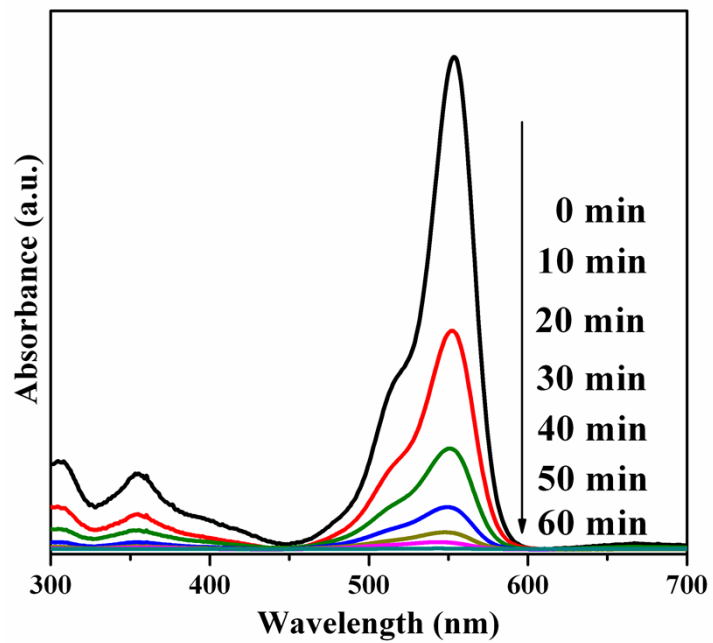

**Fig.S2** Absorption changes of RhB solution during the photo-degradation process over the 3-MMO/C3N4 sample under visible light irradiation.

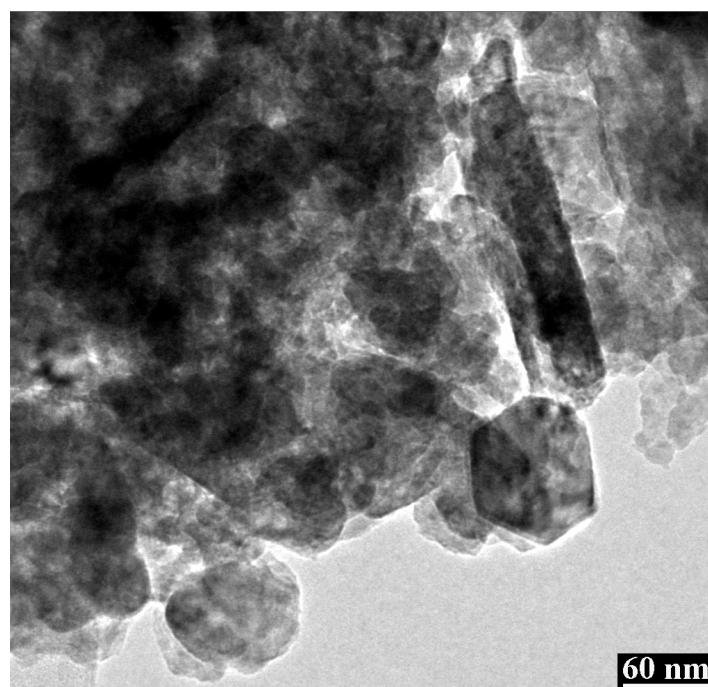

**Fig. S3.** Typical TEM image of 5-MMO/C3N4

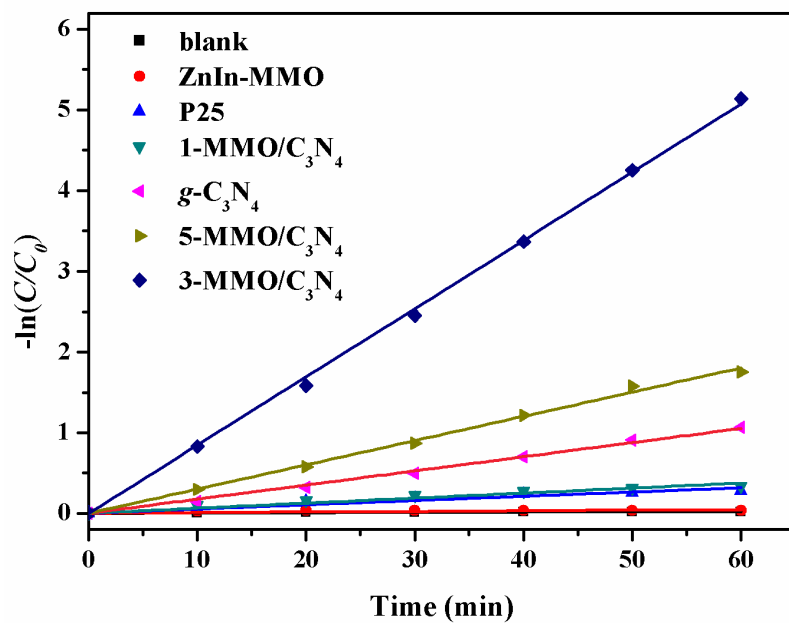

Fig. S4. Pseudo-first-order kinetic for the photo-degradation of RhB over different samples under visible light irradiation.

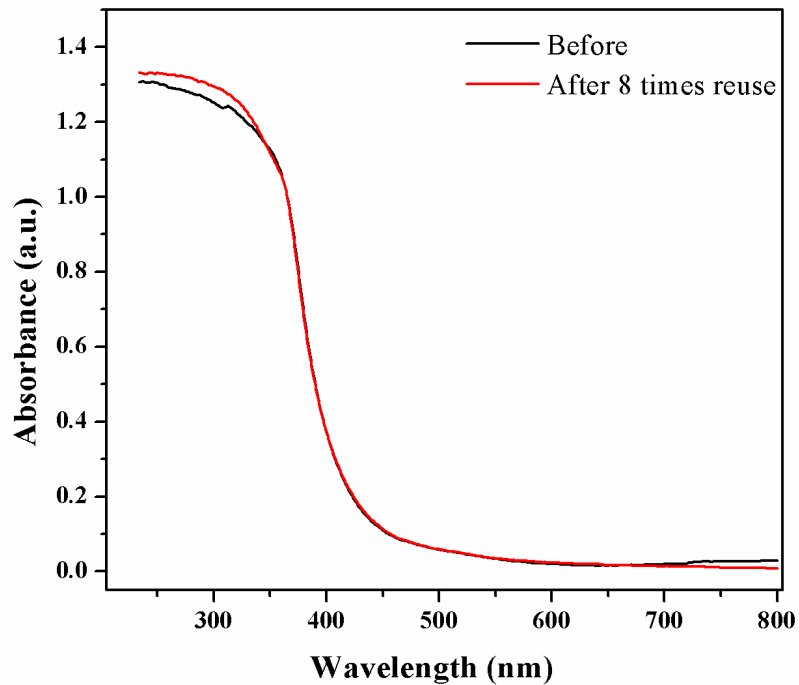

Fig. S5. UV-vis diffuse absorption spectra of 3-MMO/C<sub>3</sub>N<sub>4</sub> before use and after eight cycles.

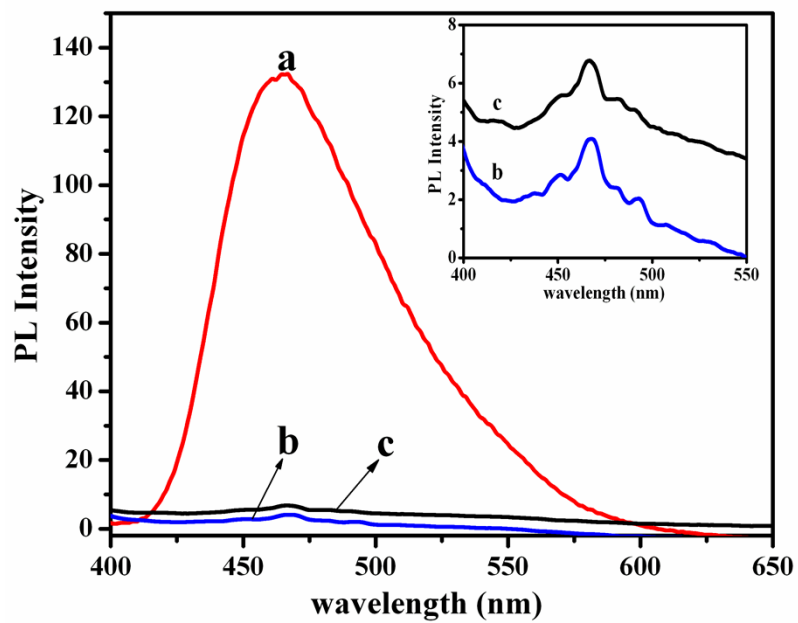

**Fig. S6** Room temperature PL emission spectra of g-C<sub>3</sub>N<sub>4</sub> (a) 3-MMO/C<sub>3</sub>N<sub>4</sub> (b) and ZnIn-MMO (c). Inset shows the enlarged PL emission spectra of 3-MMO/C<sub>3</sub>N<sub>4</sub> (b) and ZnIn-MMO (c).
